# Supplementary material for: Cu2ZnSnS4 thin films: spin coating synthesis and photoelectrochemistry
Source: Royal Society of Chemistry journal article supplement (doi:10.1039/c4ra01139b), 2014-01-01
Supplement: c4ra01139b1.pdf [file c4ra01139b1.pdf]

**Supplementary Information**

**Cu<sub>2</sub>ZnSnS<sub>4</sub> Thin Films: Spin Coating Synthesis and  
Photoelectrochemistry**

*Jing Wang, Peng Zhang\*, Xuefeng Song, and Lian Gao\**

*State Key Laboratory for Metallic Matrix Composite Materials,*

*School of Materials Science and Engineering,*

*Shanghai Jiao Tong University, Shanghai, 200240, China.*

\*E-mail address: liangao@mail.sic.ac.cn (L. Gao); pengzhang2010@sjtu.edu.cn (P.  
Zhang)

Tel: +86-12-52412718. Fax: +86-21-52413122

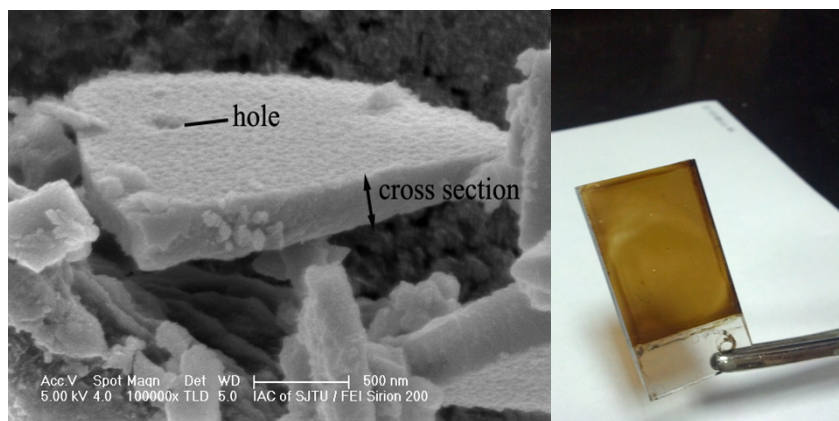

**Fig. S1** Cross-sectional SEM image and optical picture of the CZTS thin film. The thicknesses of the sample is 300-400 nm. The observed chip is the one flipped off from FTO substrate.

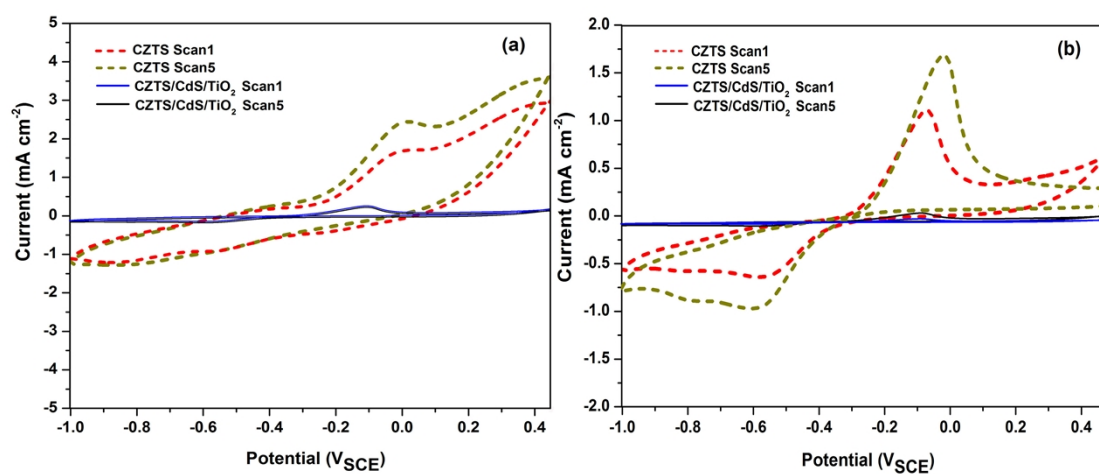

**Fig. S2** Cyclic voltammograms under dark (a) and light (b) conditions of the bared and protected CZTS thin films in a conventional three electrode configuration. Scan1, scan one time; Scan 5, scan 5 times repeatedly. The potential was swept at  $0.05 \text{ V s}^{-1}$  toward negative potential. Electrolyte,  $0.2 \text{ mol L}^{-1} \text{ Na}_2\text{SO}_4$  aqueous solution; reference electrode, SCE; counter electrode, Pt wire.

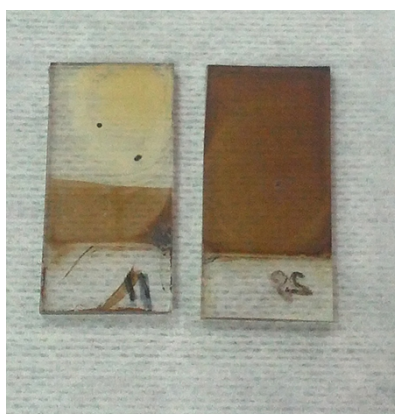

**Fig. S3** Optical images of unprotected (left) and CdS/TiO<sub>2</sub> coated (right) samples after cyclic voltammograms.
